# Supplementary material for: Nursing Home Education During the COVID-19 Pandemic
Source: PubMed Central journal article supplement — J Med Educ Curric Dev. 2021 Feb 23;8:2382120521997096. doi: 10.1177/2382120521997096 (PMC7905713; doi:10.1177/2382120521997096), 2021-02-23
Supplement: sj-pdf-1-mde-10.1177_2382120521997096.pdf [file sj-pdf-1-mde-10.1177_2382120521997096.pdf]

# Supplemental Figure 1: Initial Interest Survey

## Nursing Home Volunteering

Dr. [REDACTED] is the Medical Director at [REDACTED] Nursing Home in [REDACTED] and [REDACTED]. She is hoping to pilot a volunteer initiative involving medical students during this COVID-19 pandemic.

She has come up with multiple volunteer opportunities, and would like to gauge your interest in committing to them. If you have ideas of your own, let us know in question #12!

Of note, if you need to enter the facility to volunteer, you will be required to have your temperature taken, answer screening questions, and wear mask, gloves, & gown provided by the facility for the duration of your stay.

Hi [REDACTED], when you submit this form, the owner will be able to see your name and email address.

\* Required

1. Name: \*

Enter your answer

2. Email: \*

Enter your answer

3. Meal tray delivery -- During this time, nursing home residents are no longer able to eat their meals communally. Staff needs assistance delivering meal trays.

- Interested
- Not interested

4. Door Triage -- Each outside visitor that comes to the facility must be screened. You will remove this burden from the staff and ask screening questions and take the temperature of all visitors. You will wear a cloth or facility provided mask, as well as gloves during the shift.

- Interested
- Not interested

5. Resident biography -- The nursing home residents are confined to their rooms. This would be an opportunity to call the resident, or their family members if the resident is unable, in order to gather a life history. You will be provided with some basic questions you can ask about their lives, but are not limited to them! After, you/we would compile a paragraph about them to hang on their door! Phone numbers of residents or family would be provided to you by Dr. [REDACTED].

Interested

Not Interested

6. Window entertainer -- Options include:

1. Bringing your dog and walking them around (outside) to resident's windows
2. Painting resident's windows (supplies for this TBD)
3. Tic-tac-toe or other simple games at resident's windows (supplies for this TBD)
4. Kid parade
5. We are open to other window entertainment ideas!

Not interested

Interested - Dog

Interested - Painting

Interested - Games

Interested - Kid parade

Interested - Other Idea

Other

7. Medical Record transfer -- Dr. [REDACTED] utilizes two medical record EHR when working with her nursing home patients. It would be helpful to her, and to other providers in an emergency, for basic medical records of her nursing home resident's be transferred into [REDACTED]. This would require remote access to [REDACTED] and obtaining student access to the nursing home EHR.

Interested

Not Interested

8. [REDACTED] Hospice No One Dies Alone -- This is an opportunity through another facility that Dr. [REDACTED] works closely with. Hospice volunteers can serve at bedside at the end of life with our NODA (No One Dies Alone) program. NODA is called when the family can't be at bedside when the patient is dying. This type of visitation is still allowed, even with COVID19 visit restrictions. This program will require a short application through [REDACTED].

Interested

Not interested

9. Intercom -- Read/entertain over the intercom of the facility to keep resident's enthused! Sing alongs, readings, poetry, etc. Material will have to be pre-approved by Dr. [REDACTED].

- Interested
- Not interested

10. Record audio/musical medium to be played for residents.

- Interested
- Not interested

11. Learning opportunities with older adults and geriatrics -- As medical director and hospice director, Dr. [REDACTED] conducts now virtual interdisciplinary rounds on her hospice patients weekly. She is willing to allow students to sit in on one of her weekly rounds with hospice staff and hospice nurses. [REDACTED]

- Interested
- Not interested

12. What other ideas do you have? -- Should we flamingo/pinwheel the yard? Mini-basketball hoops in the resident rooms? Mini gardens? Crafts?

Enter your answer

13. Dr. [REDACTED] is also the medical director of a nursing home in [REDACTED]. From [REDACTED], it is about a 45 minute drive one-way. Would you be interested in piloting the same volunteer initiatives as above at this facility?

- Interested
- Not interested

Submit

This content is created by the owner of the form. The data you submit will be sent to the form owner. Never give out your password.

Powered by Microsoft Forms | [Privacy and cookies](#) | [Terms of use](#)
