# Supplementary material for: Nursing Home Education During the COVID-19 Pandemic
Source: PubMed Central journal article supplement — J Med Educ Curric Dev. 2021 Feb 23;8:2382120521997096. doi: 10.1177/2382120521997096 (PMC7905713; doi:10.1177/2382120521997096), 2021-02-23
Supplement: sj-pdf-2-mde-10.1177_2382120521997096.pdf [file sj-pdf-2-mde-10.1177_2382120521997096.pdf]

Supplemental Figure 2: Resident Biography/Life Story Worksheet, Question Ideas

**Resident Name:**

**Info provided by:**

Early Life:

\_\_\_\_\_ was born on \_\_\_\_\_ in \_\_\_\_\_. They had \_\_\_\_\_ brothers and sisters. Their father was a \_\_\_\_\_ and their mother was a \_\_\_\_\_. As a kid, some of their happiest memories were \_\_\_\_\_. In all, they completed \_\_\_\_\_ years of school at \_\_\_\_\_ & \_\_\_\_\_. Their first job was \_\_\_\_\_, and their favorite job was \_\_\_\_\_.

Adulthood:

\_\_\_\_\_ spent most of their life as a \_\_\_\_\_. Besides their jobs, they enjoyed \_\_\_\_\_. A special person in their life is/was \_\_\_\_\_. \_\_\_\_\_'s favorite thing about that person is \_\_\_\_\_. As an adult, they settled in \_\_\_\_\_. Their favorite places(s) to travel to were \_\_\_\_\_. Their biggest hero(es) in life was/were \_\_\_\_\_. If they could change one thing about their life, it would be \_\_\_\_\_. Their proudest moments in life are \_\_\_\_\_. Favorite life motto/quote to live by: \_\_\_\_\_. Something I am very good at is: \_\_\_\_\_. You can come to me for advice about \_\_\_\_\_.

## **Additional questions you can consider asking if the conversation is really rolling!**

### Interview Questions for Elders

<https://www.agingcare.com/articles/questions-to-ask-elderly-parents-147907.htm>

1. What was the happiest moment of your life?
2. What are the most important lessons you've learned in life?
3. What is your earliest memory?
4. What was your favorite thing to do for fun (hobbies, beach, etc.)?
5. How would you like to be remembered?

<https://blog.ioaging.org/activities-wellness/8-memoir-writing-prompts-for-older-adults-how-to-write-your-life-story/>

6. Can you recall your childhood best friend and some of the things you used to do together?  
Places you used to go? Ways you pulled your imaginations together?
7. What was one of your favorite songs from long ago that comes with strong memories or feelings?
