# Supplementary material for: Nursing Home Education During the COVID-19 Pandemic
Source: PubMed Central journal article supplement — J Med Educ Curric Dev. 2021 Feb 23;8:2382120521997096. doi: 10.1177/2382120521997096 (PMC7905713; doi:10.1177/2382120521997096), 2021-02-23
Supplement: sj-pdf-3-mde-10.1177_2382120521997096.pdf [file sj-pdf-3-mde-10.1177_2382120521997096.pdf]

# Supplemental Figure 3: Follow-Up Survey

## Nursing Home Volunteering Follow Up

We want to thank you for your participation in our volunteer initiatives! You are receiving this follow up survey because you participated in [redacted] Nursing Home volunteer initiatives during the [redacted] Infectious Diseases course. We are interested to know your thoughts about them and your experiences with us. If you are willing, please fill out this follow up survey about your experiences! It should take about 5-10 minutes.

If you have questions or concerns, you can contact [redacted]  
[redacted]

Thank you for your time!

[redacted]

...

### 1. Which volunteer initiatives did you participate in? (select all that apply)

- [redacted] Gardening
- Medical Record Transfer
- Window Entertainment
- No One Dies Alone
- Resident Biographies
- Online Literature Review

### 2. How many volunteer hours do you think you completed while participating in our programs?

### 3. What did you like about our volunteer opportunities?

### 4. What did you dislike about our volunteer opportunities?

Enter your answer

5. What is something you learned about geriatrics while participating in our volunteer programs?

Enter your answer

6. Other comments, questions, thoughts:

Enter your answer

Submit

Never give out your password. Report abuse

This content is created by the owner of the form. The data you submit will be sent to the form owner.

Powered by Microsoft Forms | [Privacy and cookies](#) | [Terms of use](#)
